# Supplementary material
Source: PubMed Central journal article supplement (PMC5497575)
Supplement: NIHMS213430-supplement-movie_legends.pdf [file NIHMS213430-supplement-movie_legends.pdf]

### **Legends for Video files:**

**Movie 1:** Time-lapse imaging of control morphant (**1.5 pmol**) demonstrating normal lymphatic endothelial cell sprouting away from posterior cardinal vein and normal parachordal lymphangioblast extending along horizontal myoseptum.

**Movie 2:** Time-lapse imaging of miR-126a morphant (**1.5 pmol**) demonstrating normal lymphatic endothelial cell sprouting, but defective parachordal lymphangioblast extension along horizontal myoseptum.

**Movie 3:** Time-lapse imaging of control morphant (**2 pmol**) demonstrating normal formation of lymphangiogenic and angiogenic posterior cardinal vein sprouts.

**Movie 4:** Time-lapse imaging of miR-126a morphant (**2 pmol**) demonstrating defects in lymphangiogenic and angiogenic posterior cardinal vein sprouts.
