# Supplementary material
Source: PubMed Central journal article supplement (PMC5497575)

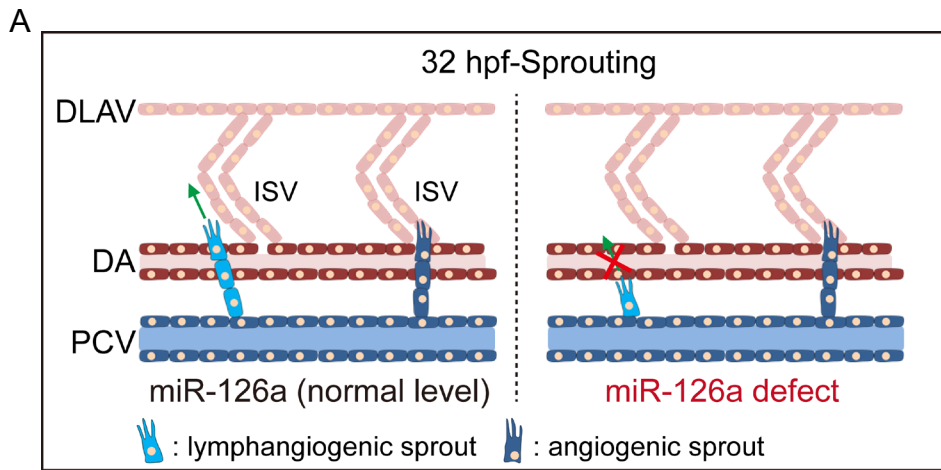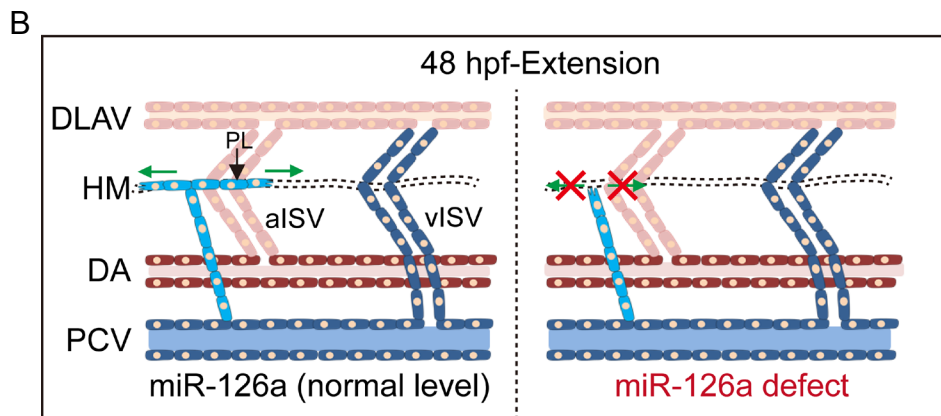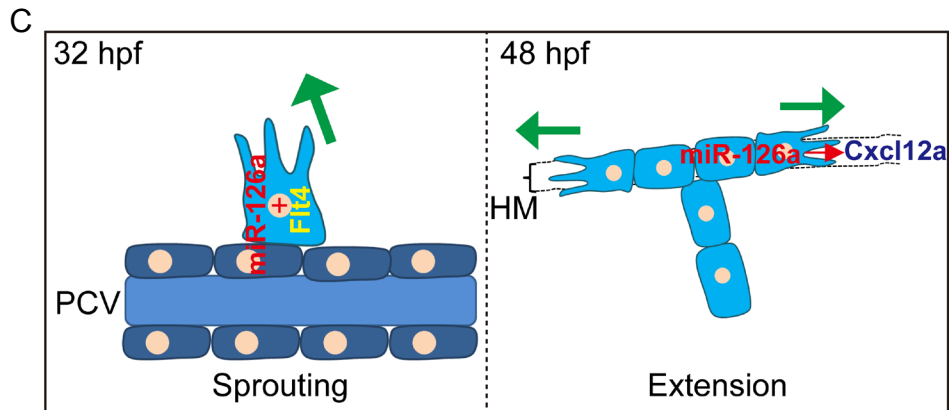

Supplement: NIHMS213430-supplement-Graphic_Abstract.pdf [file NIHMS213430-supplement-Graphic_Abstract.pdf]
